# Supplementary material for: Spirobifluorene-based pyrazoloquinolines: efficient blue electroluminescent materialsElectronic supplementary information (ESI) available: DSC curves for spiro-PAQ-Me and spiro-PAQ-Ph. See http://www.rsc.org/suppdata/jm/b4/b402584a/
Source: Royal Society of Chemistry journal article supplement (doi:10.1039/b402584a), 2004-01-01
Supplement: b402584a.doc [file b402584a.doc]

**Supplementary Information** **for**

**Spirobifluorene-based pyrazoloquinolines: efficient blue electroluminescent materials**

Ching-Hsin Chen,*a* Fang-Iy Wu,*a* Ching-Fong Shu,*,*a* Chin-Hsiung Chien*b* and Yu-Tai Tao*,*b*

*a* Department of Applied Chemistry, National Chiao Tung University

Hsin-Chu, Taiwan, 30035

*b* Institute of Chemistry, Academia Sinica

Taipei, Taiwan, 11529


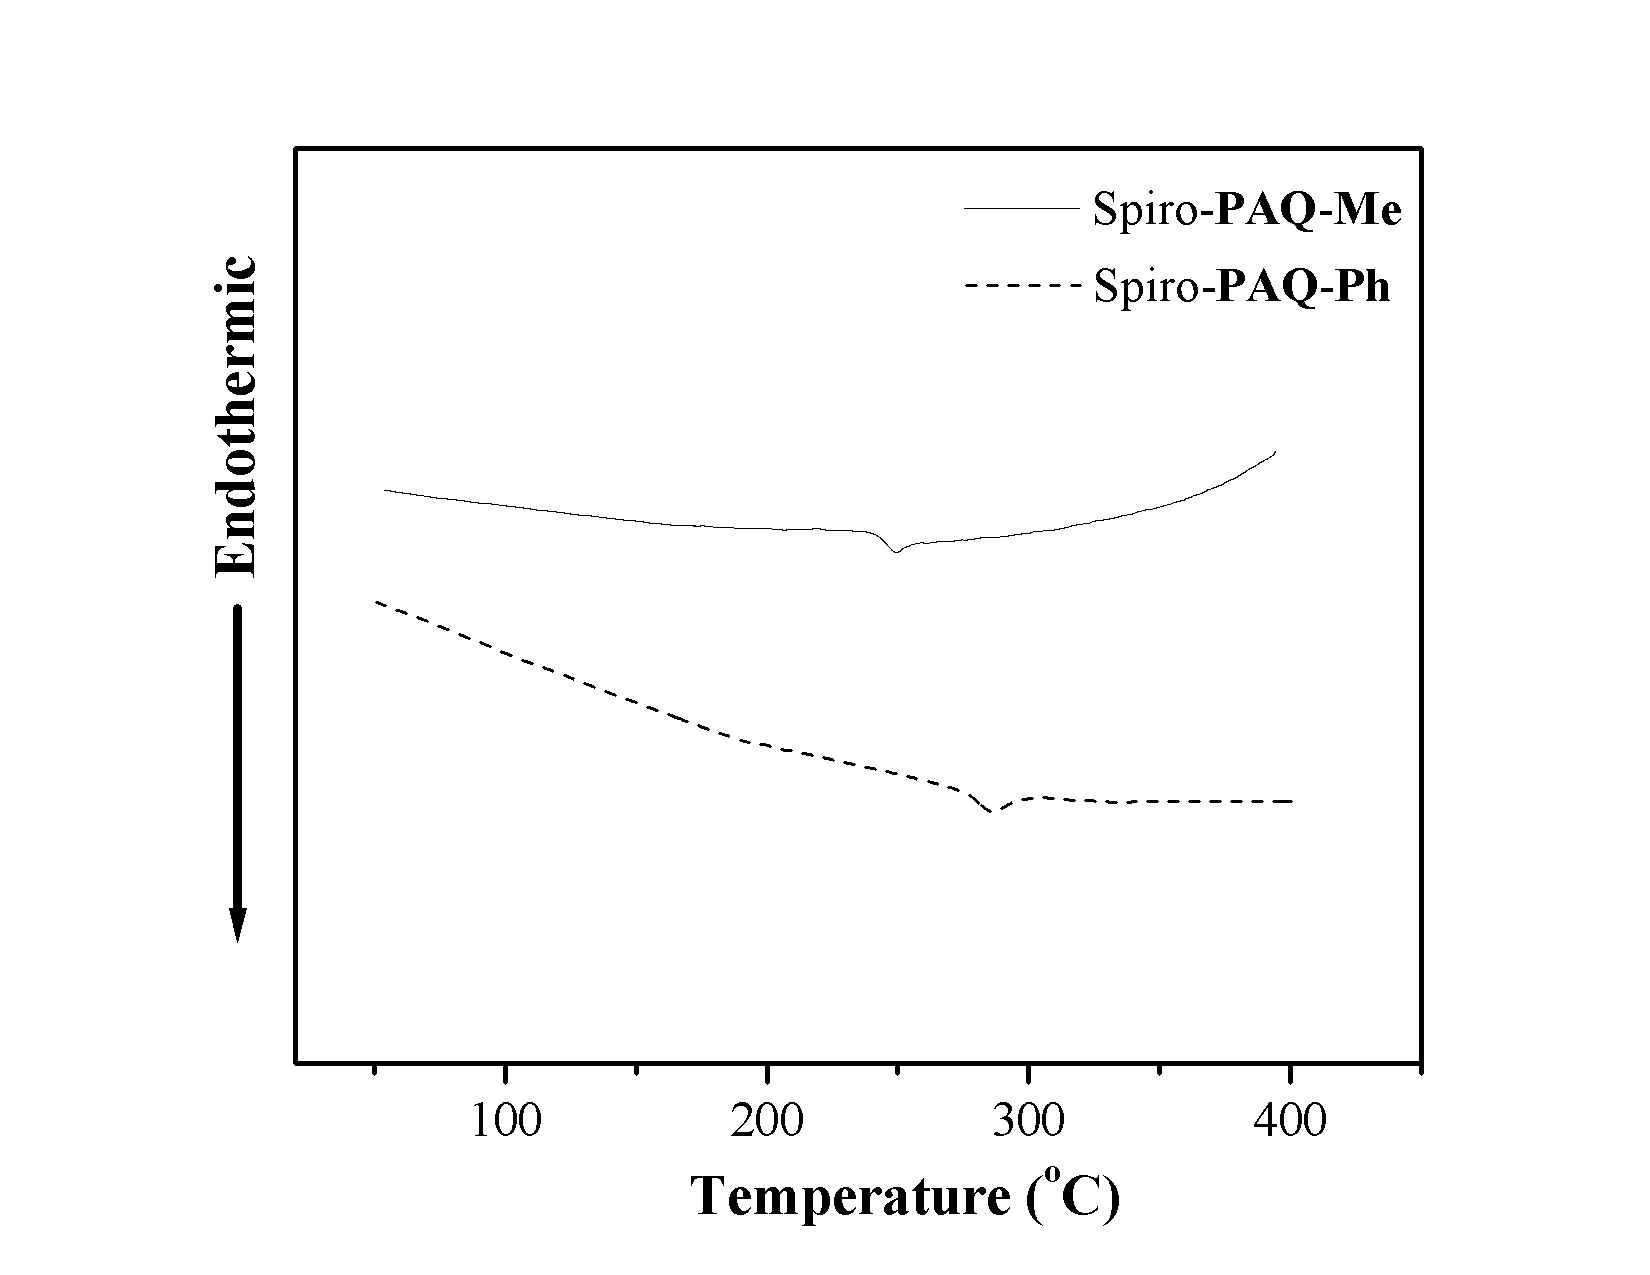


**Figure S1**. Differential scanning calorimetry (DSC) data obtained using spiro**-PAQ-Me** and spiro**-PAQ-Ph**.
